# Supplementary material for: Transcription-Factor-Mediated DNA Looping Probed by High-Resolution, Single-Molecule Imaging in Live E. coli Cells
Source: PubMed Central journal article supplement (PMC3708714; doi:10.1371/journal.pbio.1001591), 2013-06-18

Figure S3

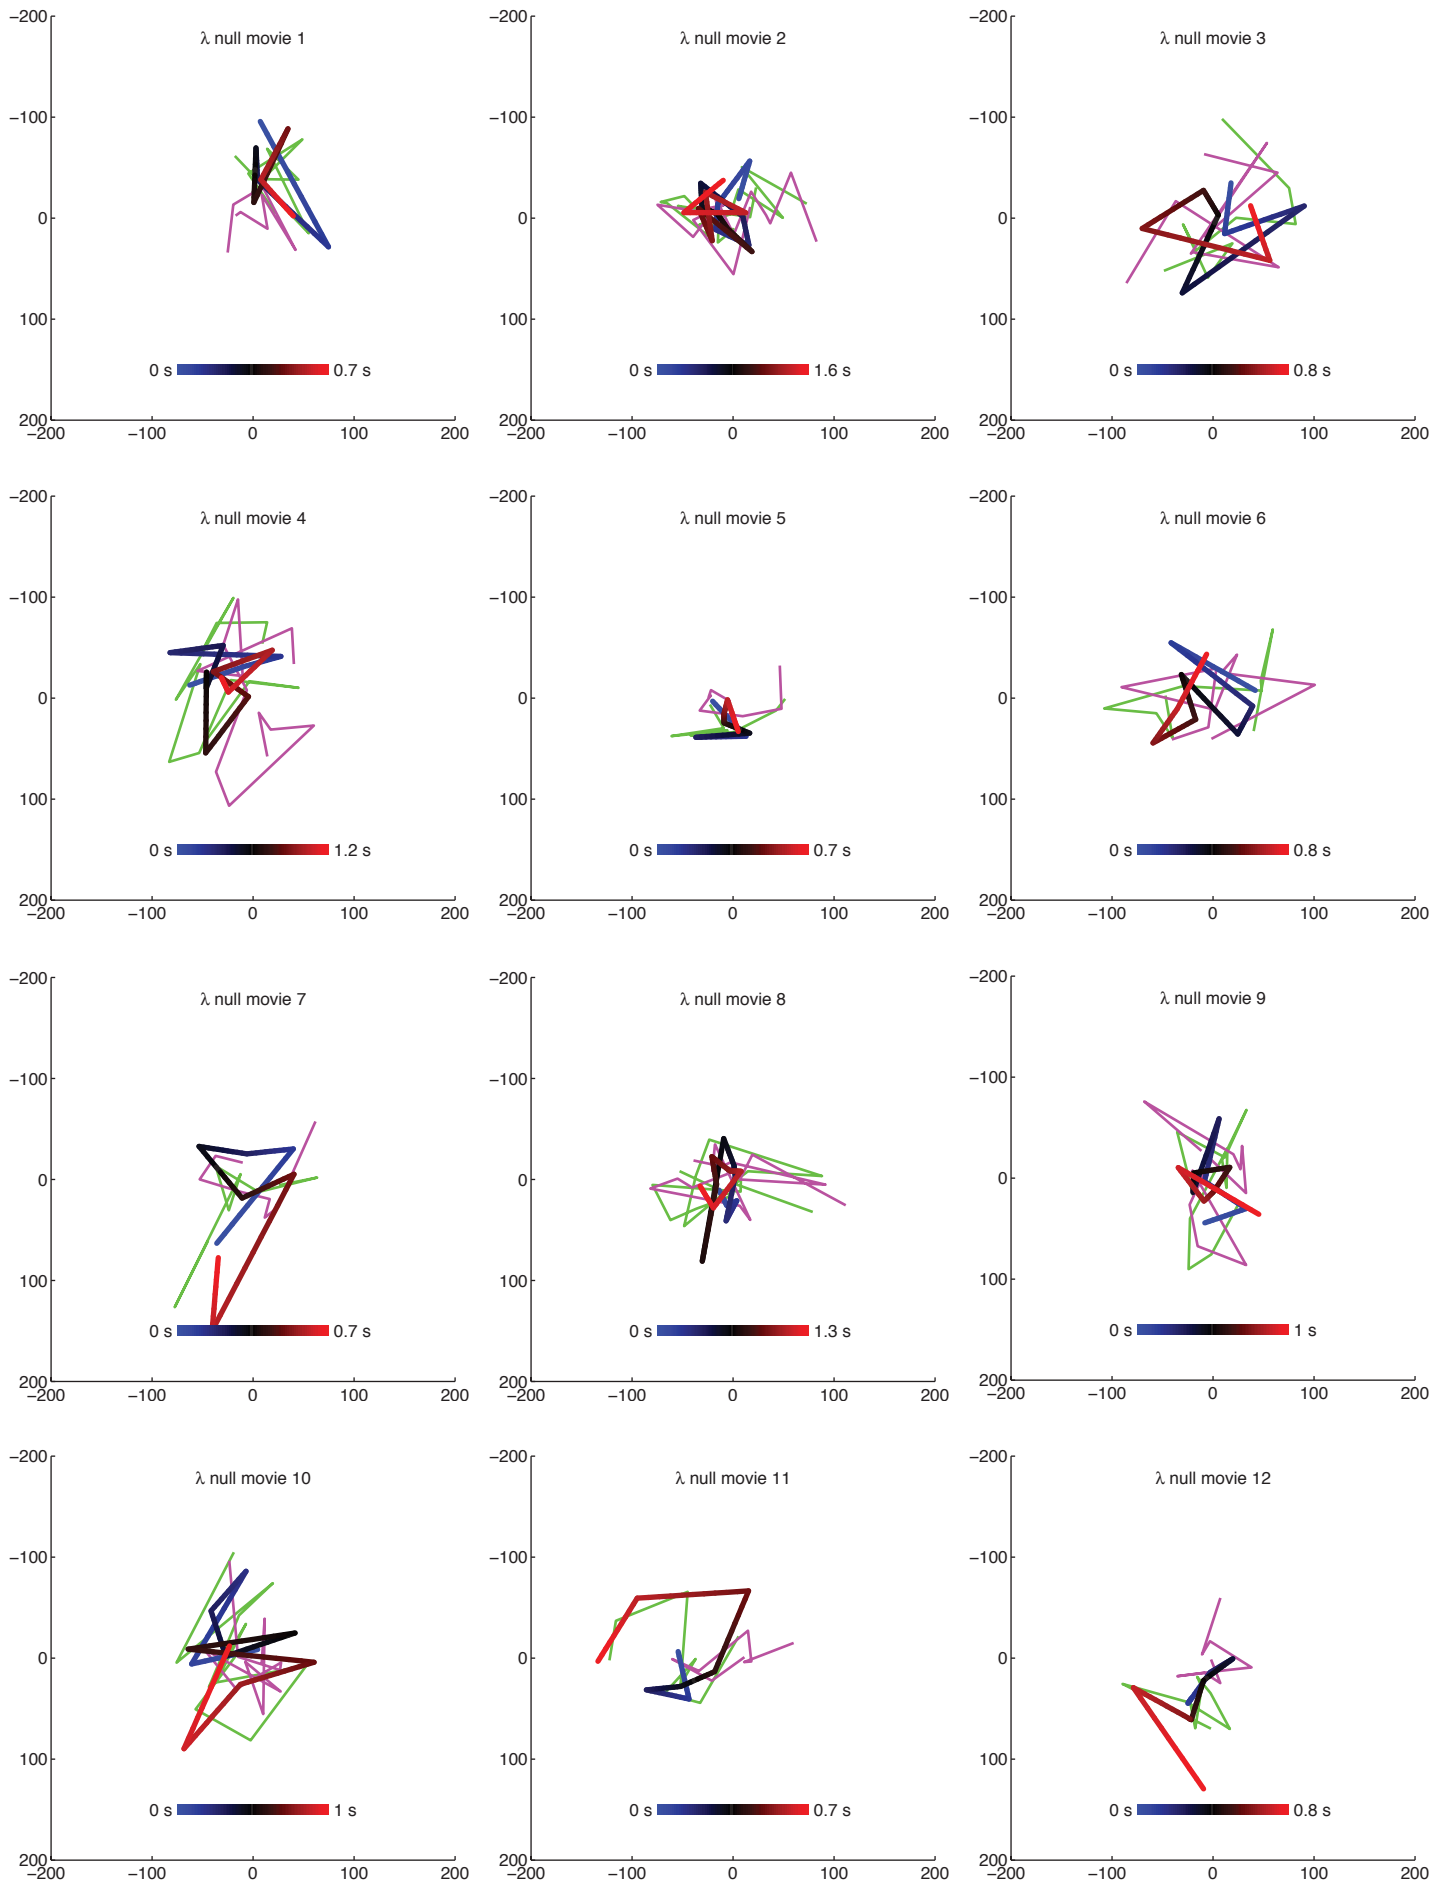

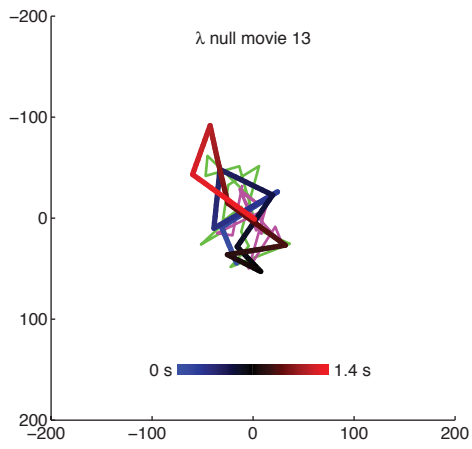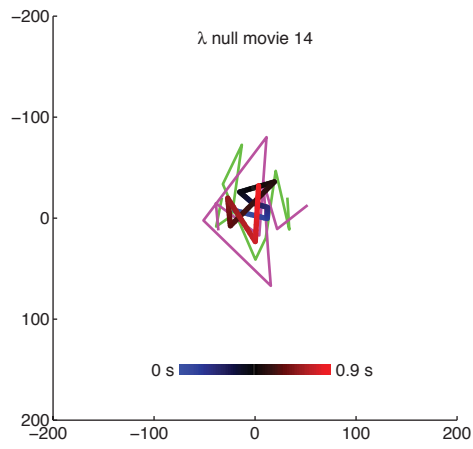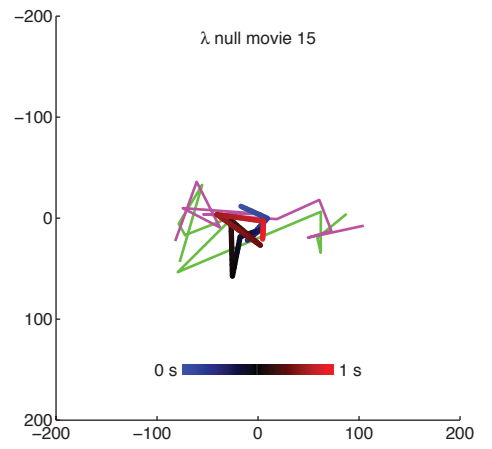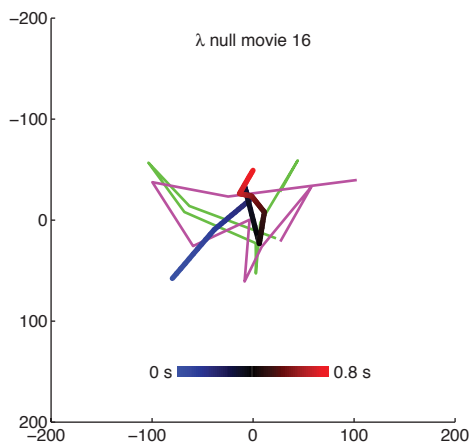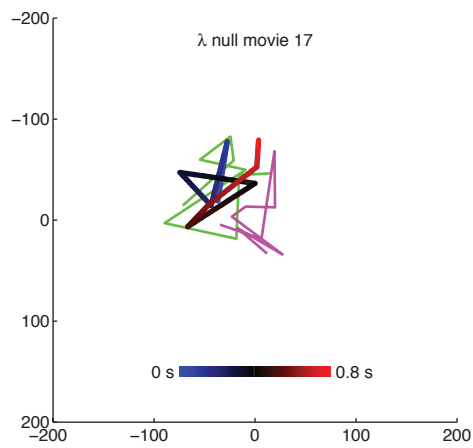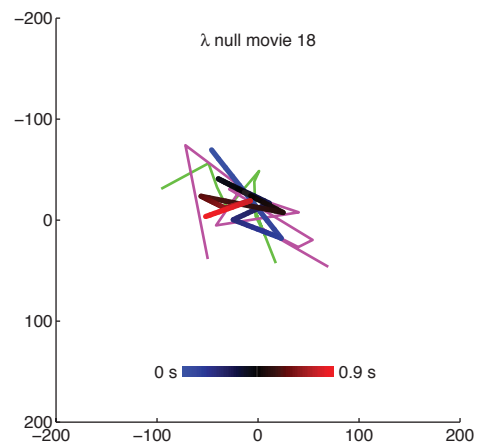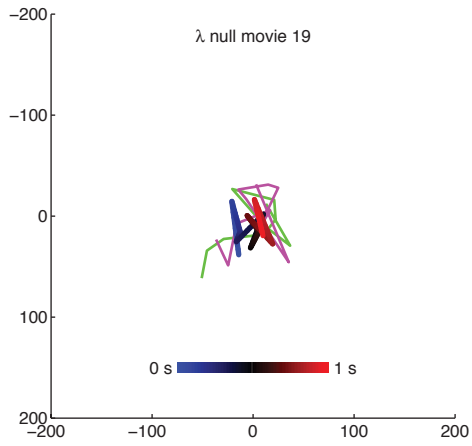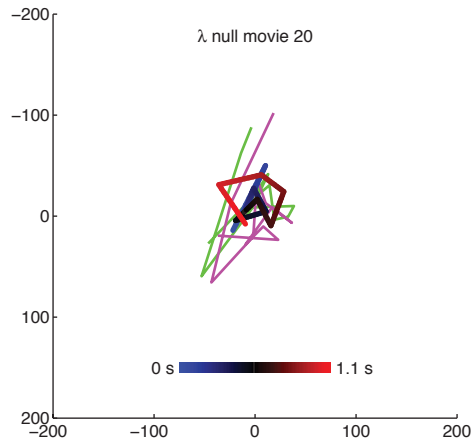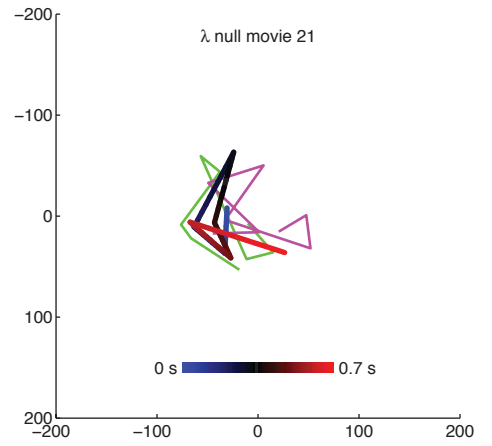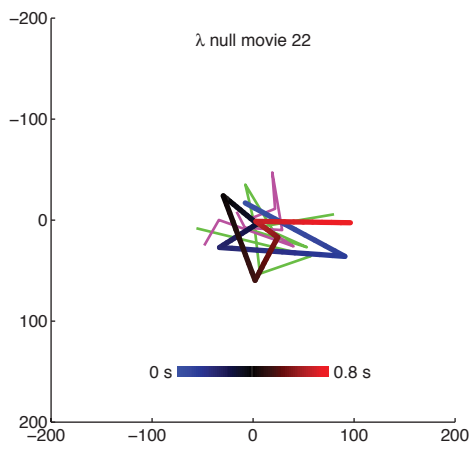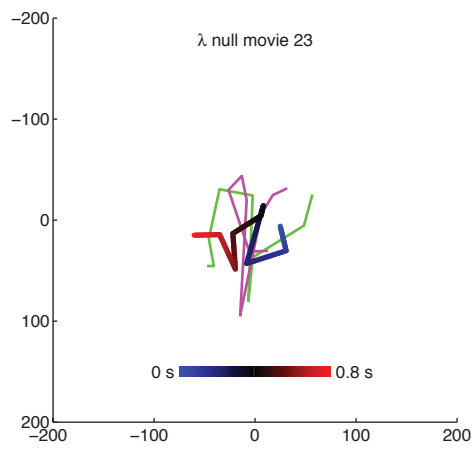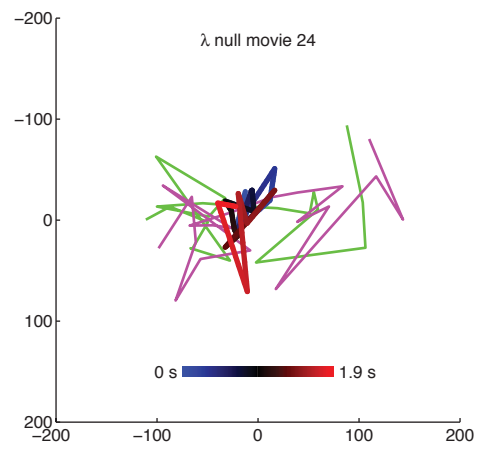

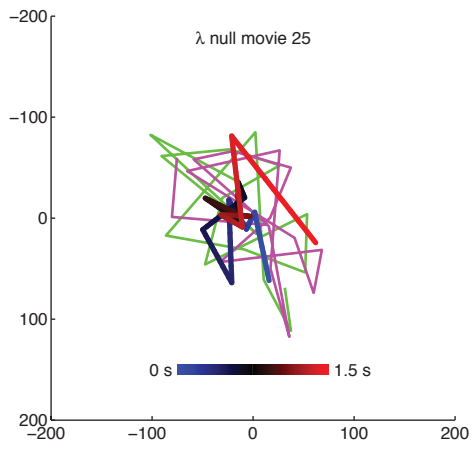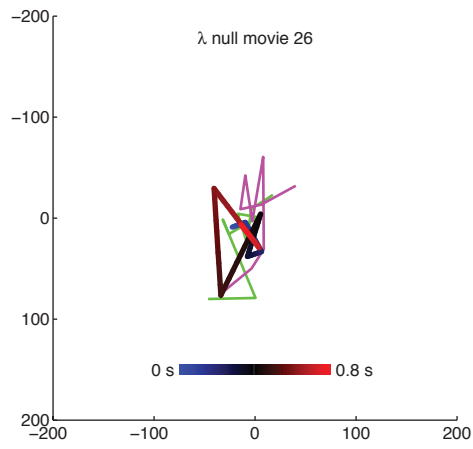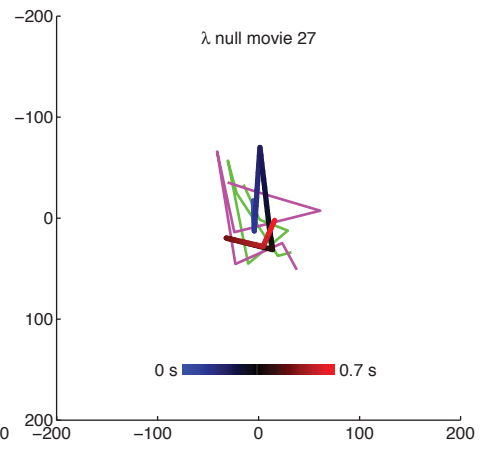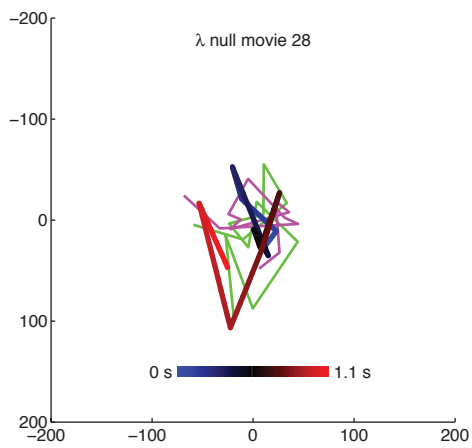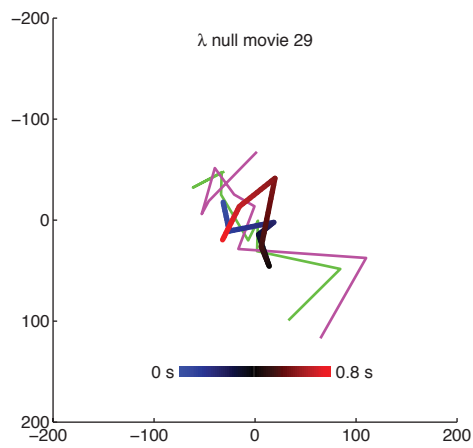

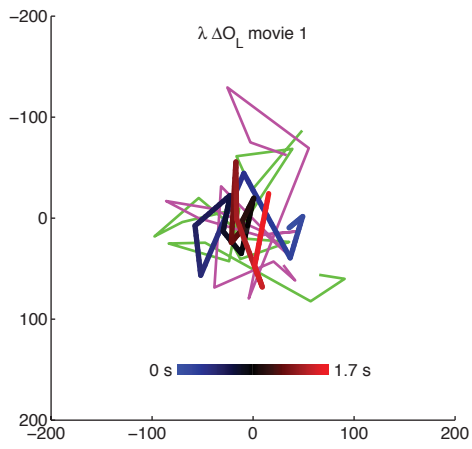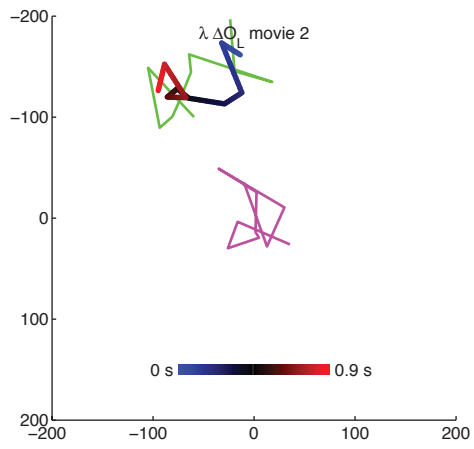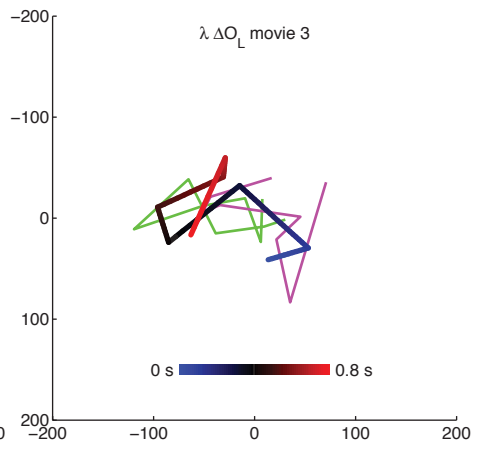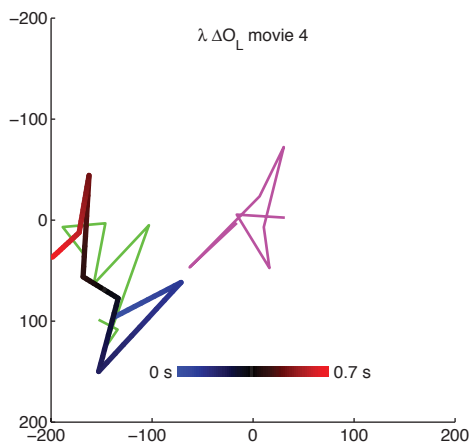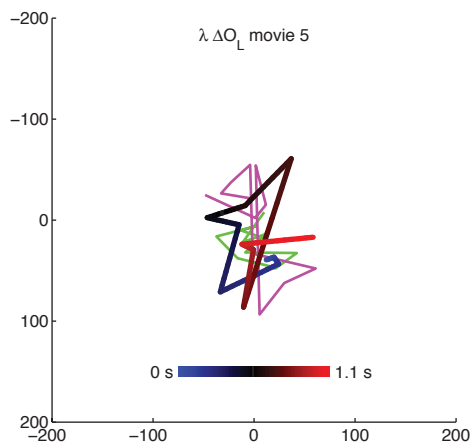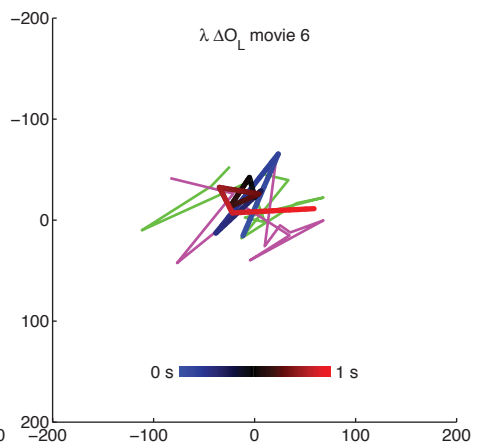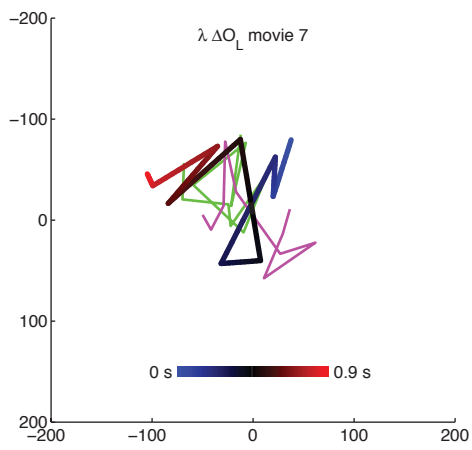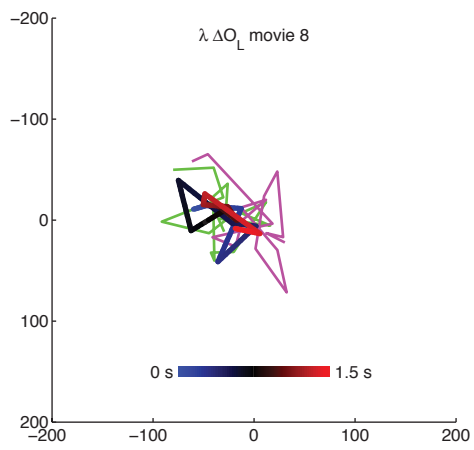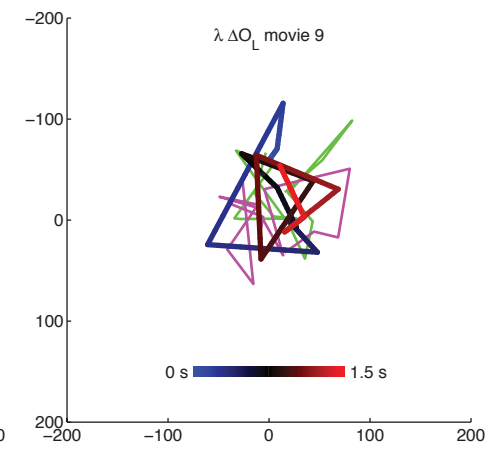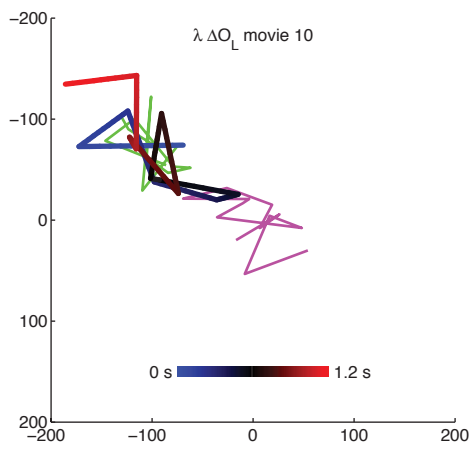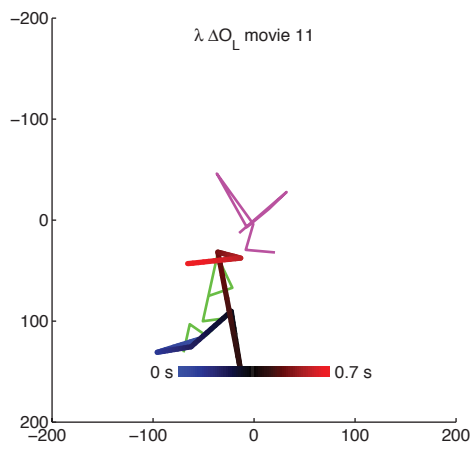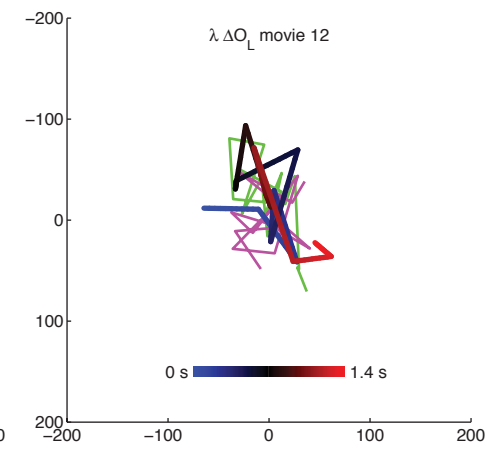

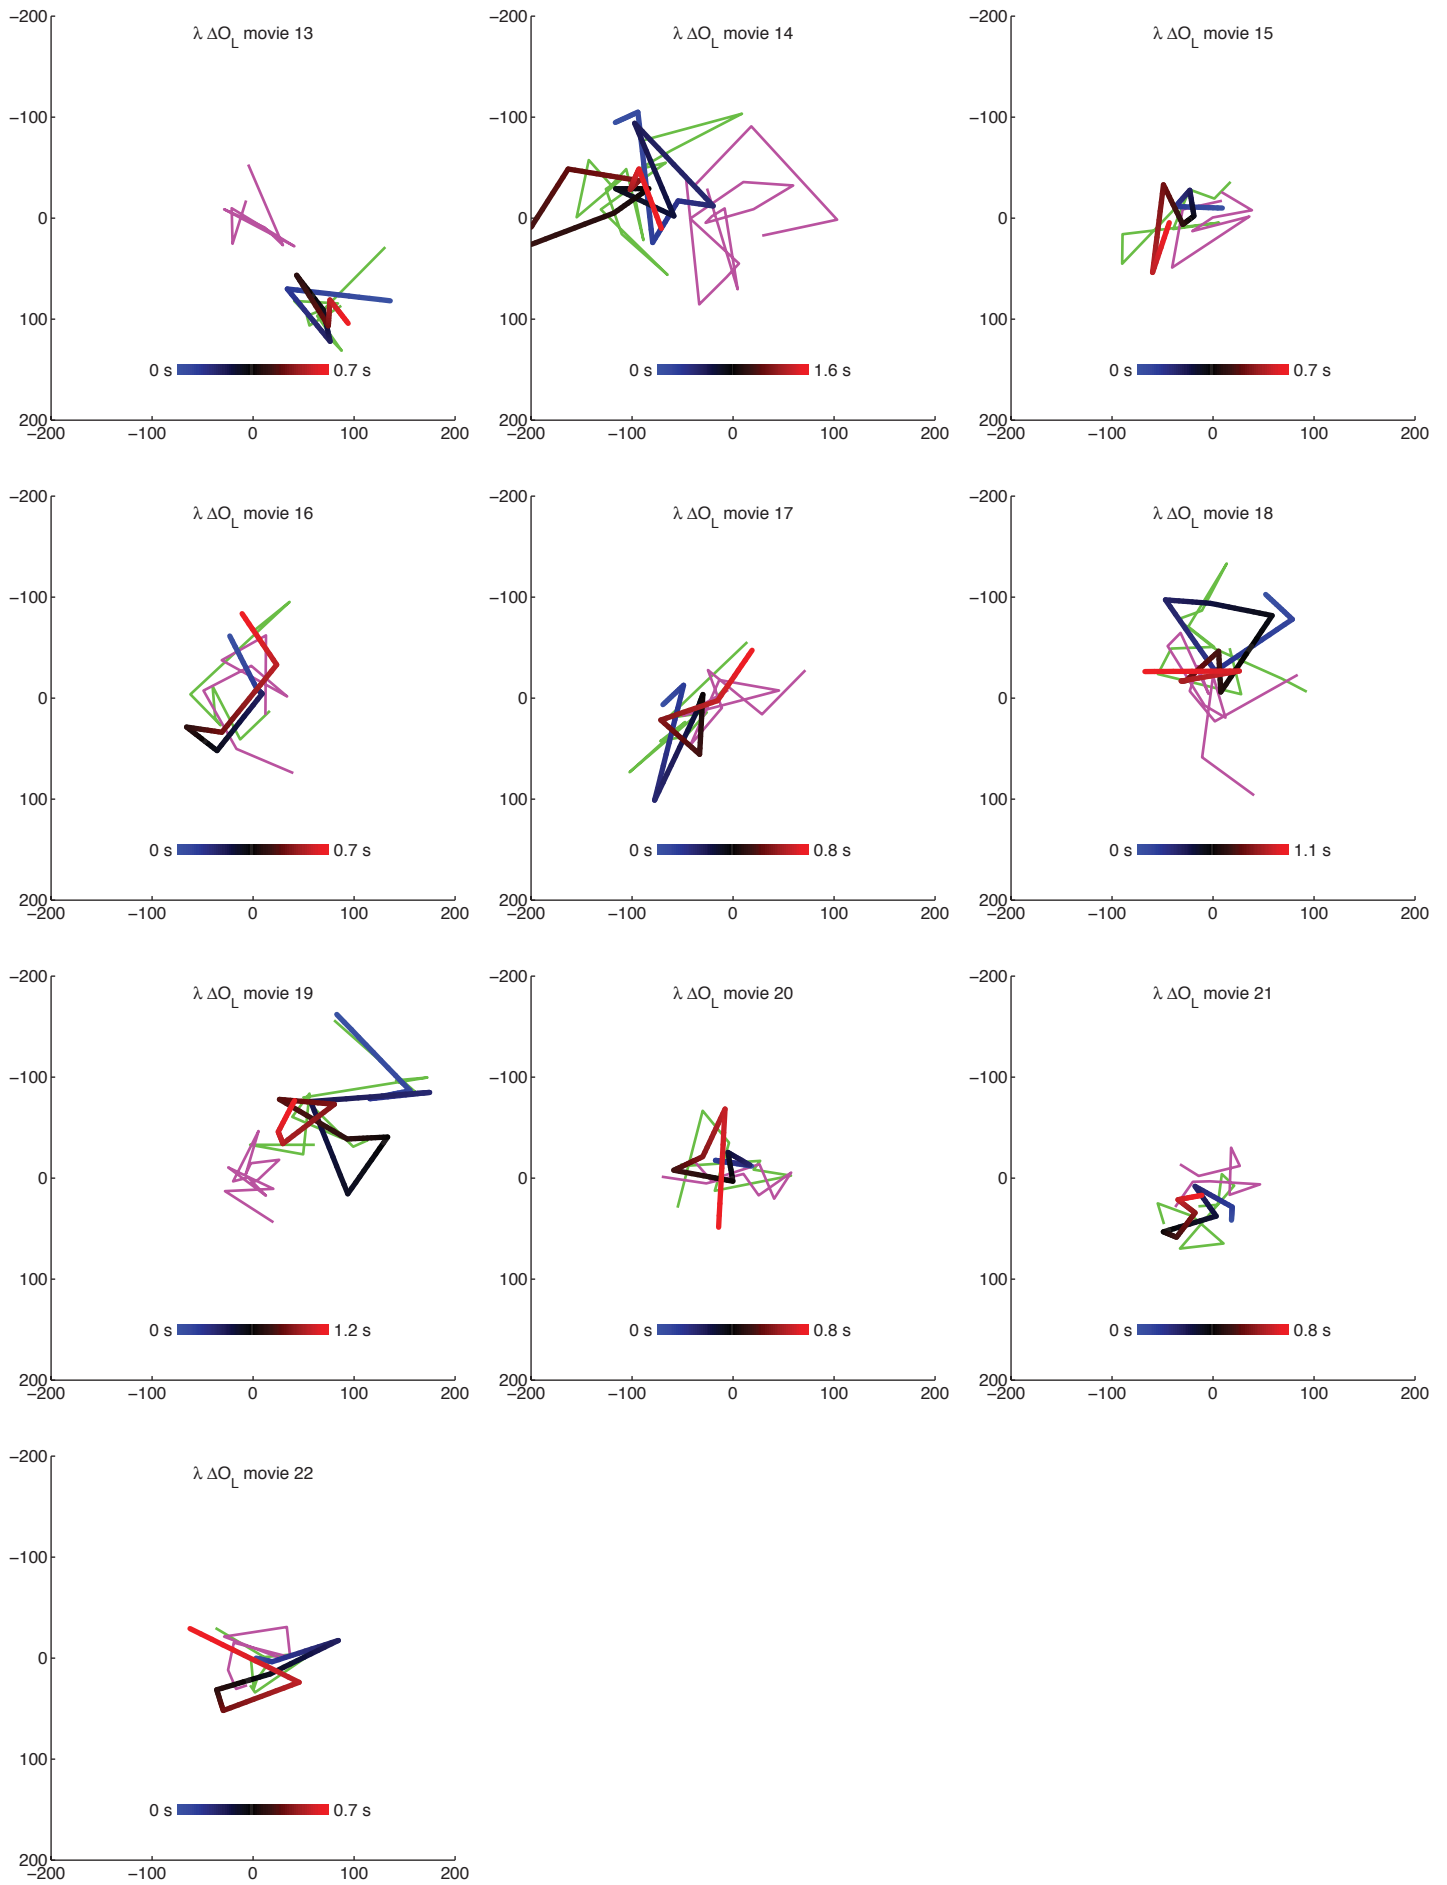

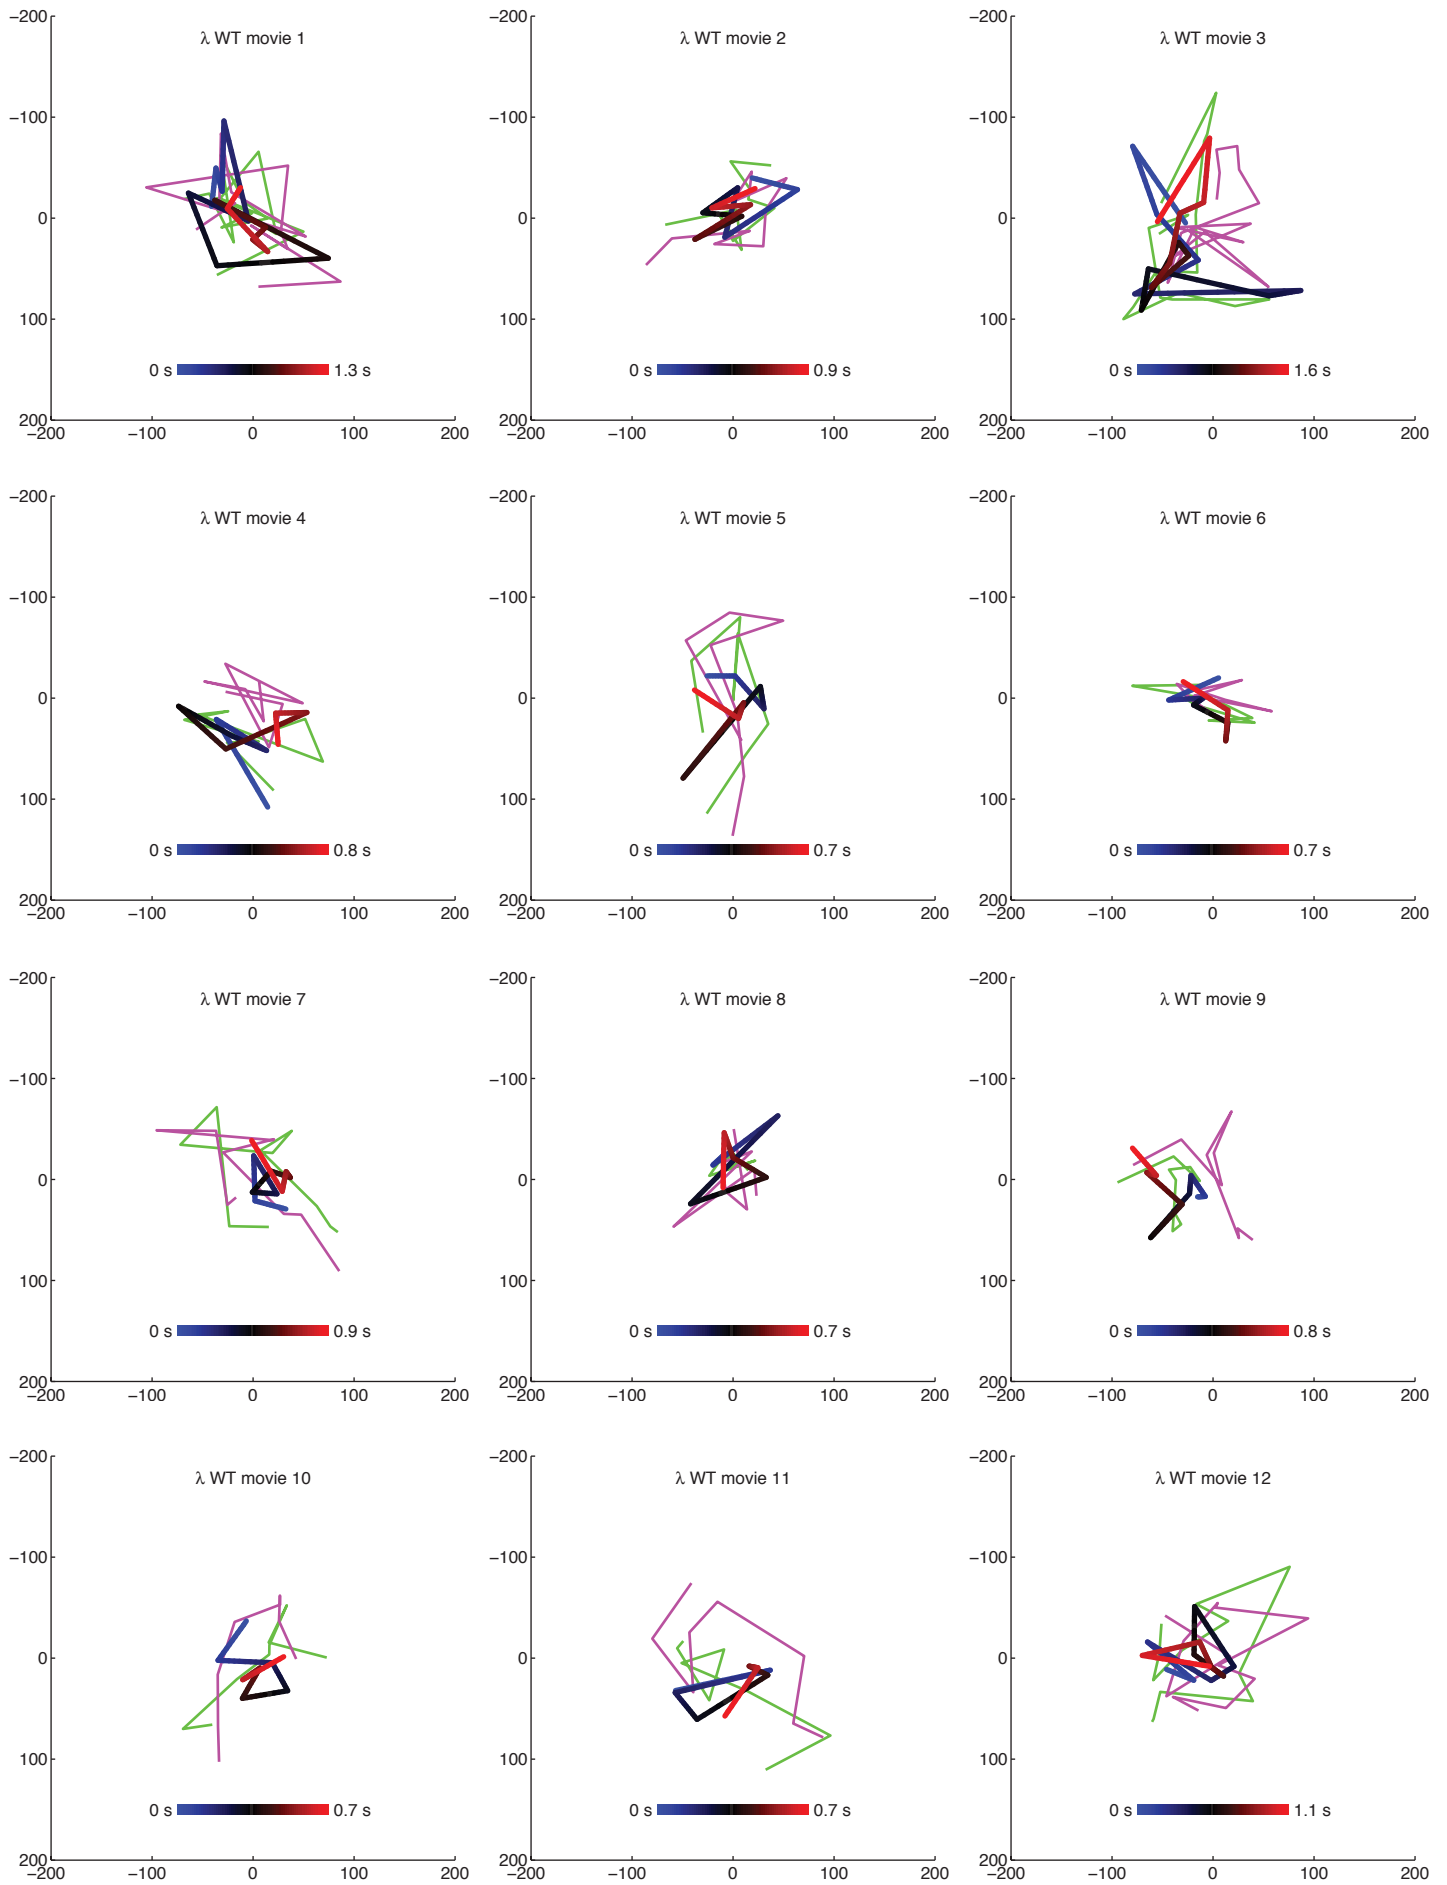

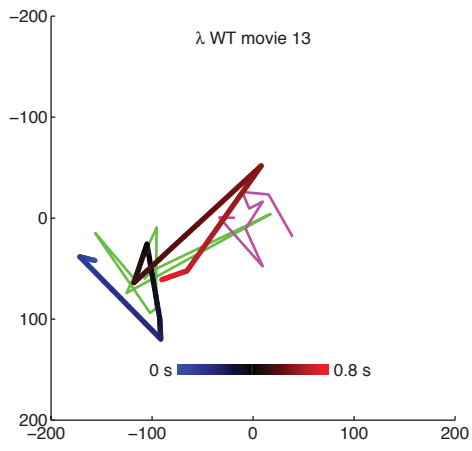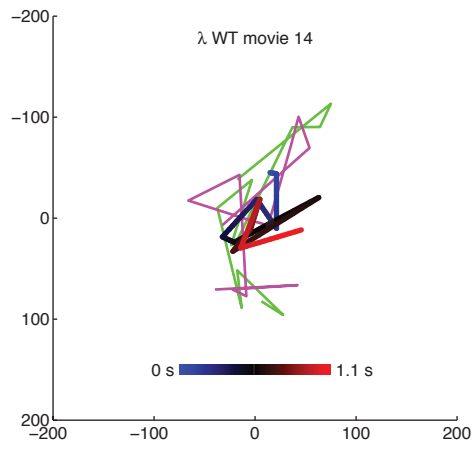

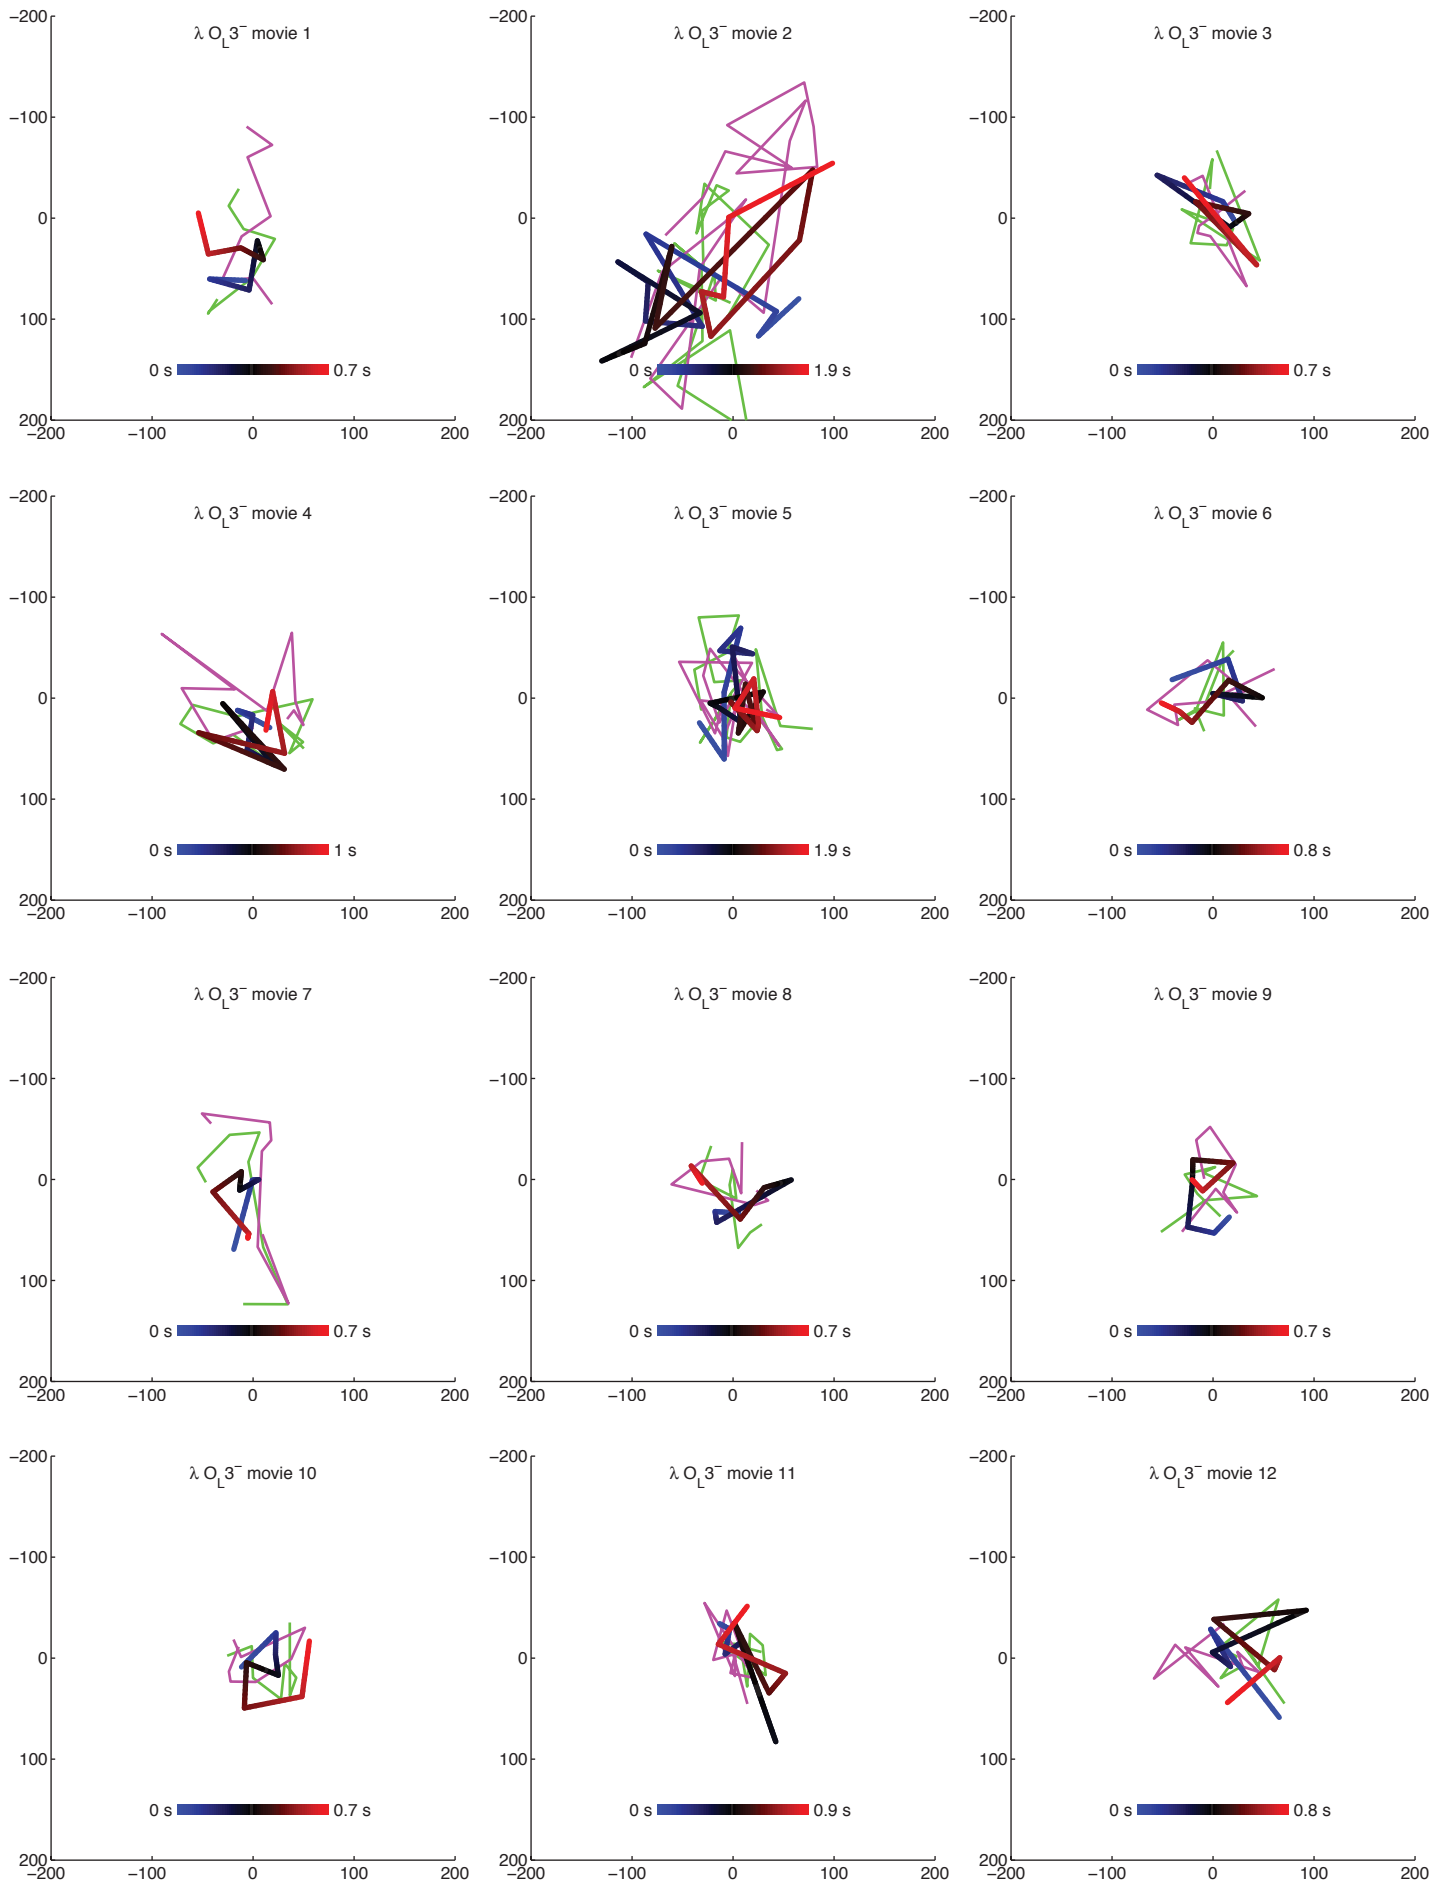



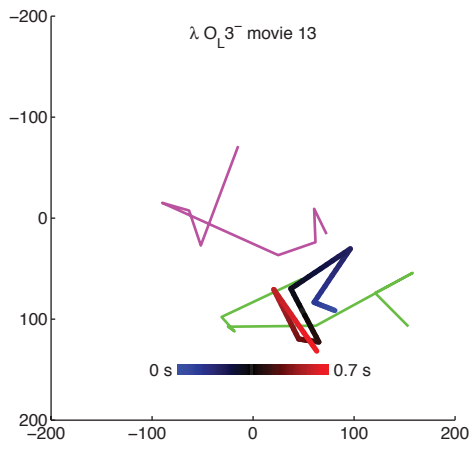

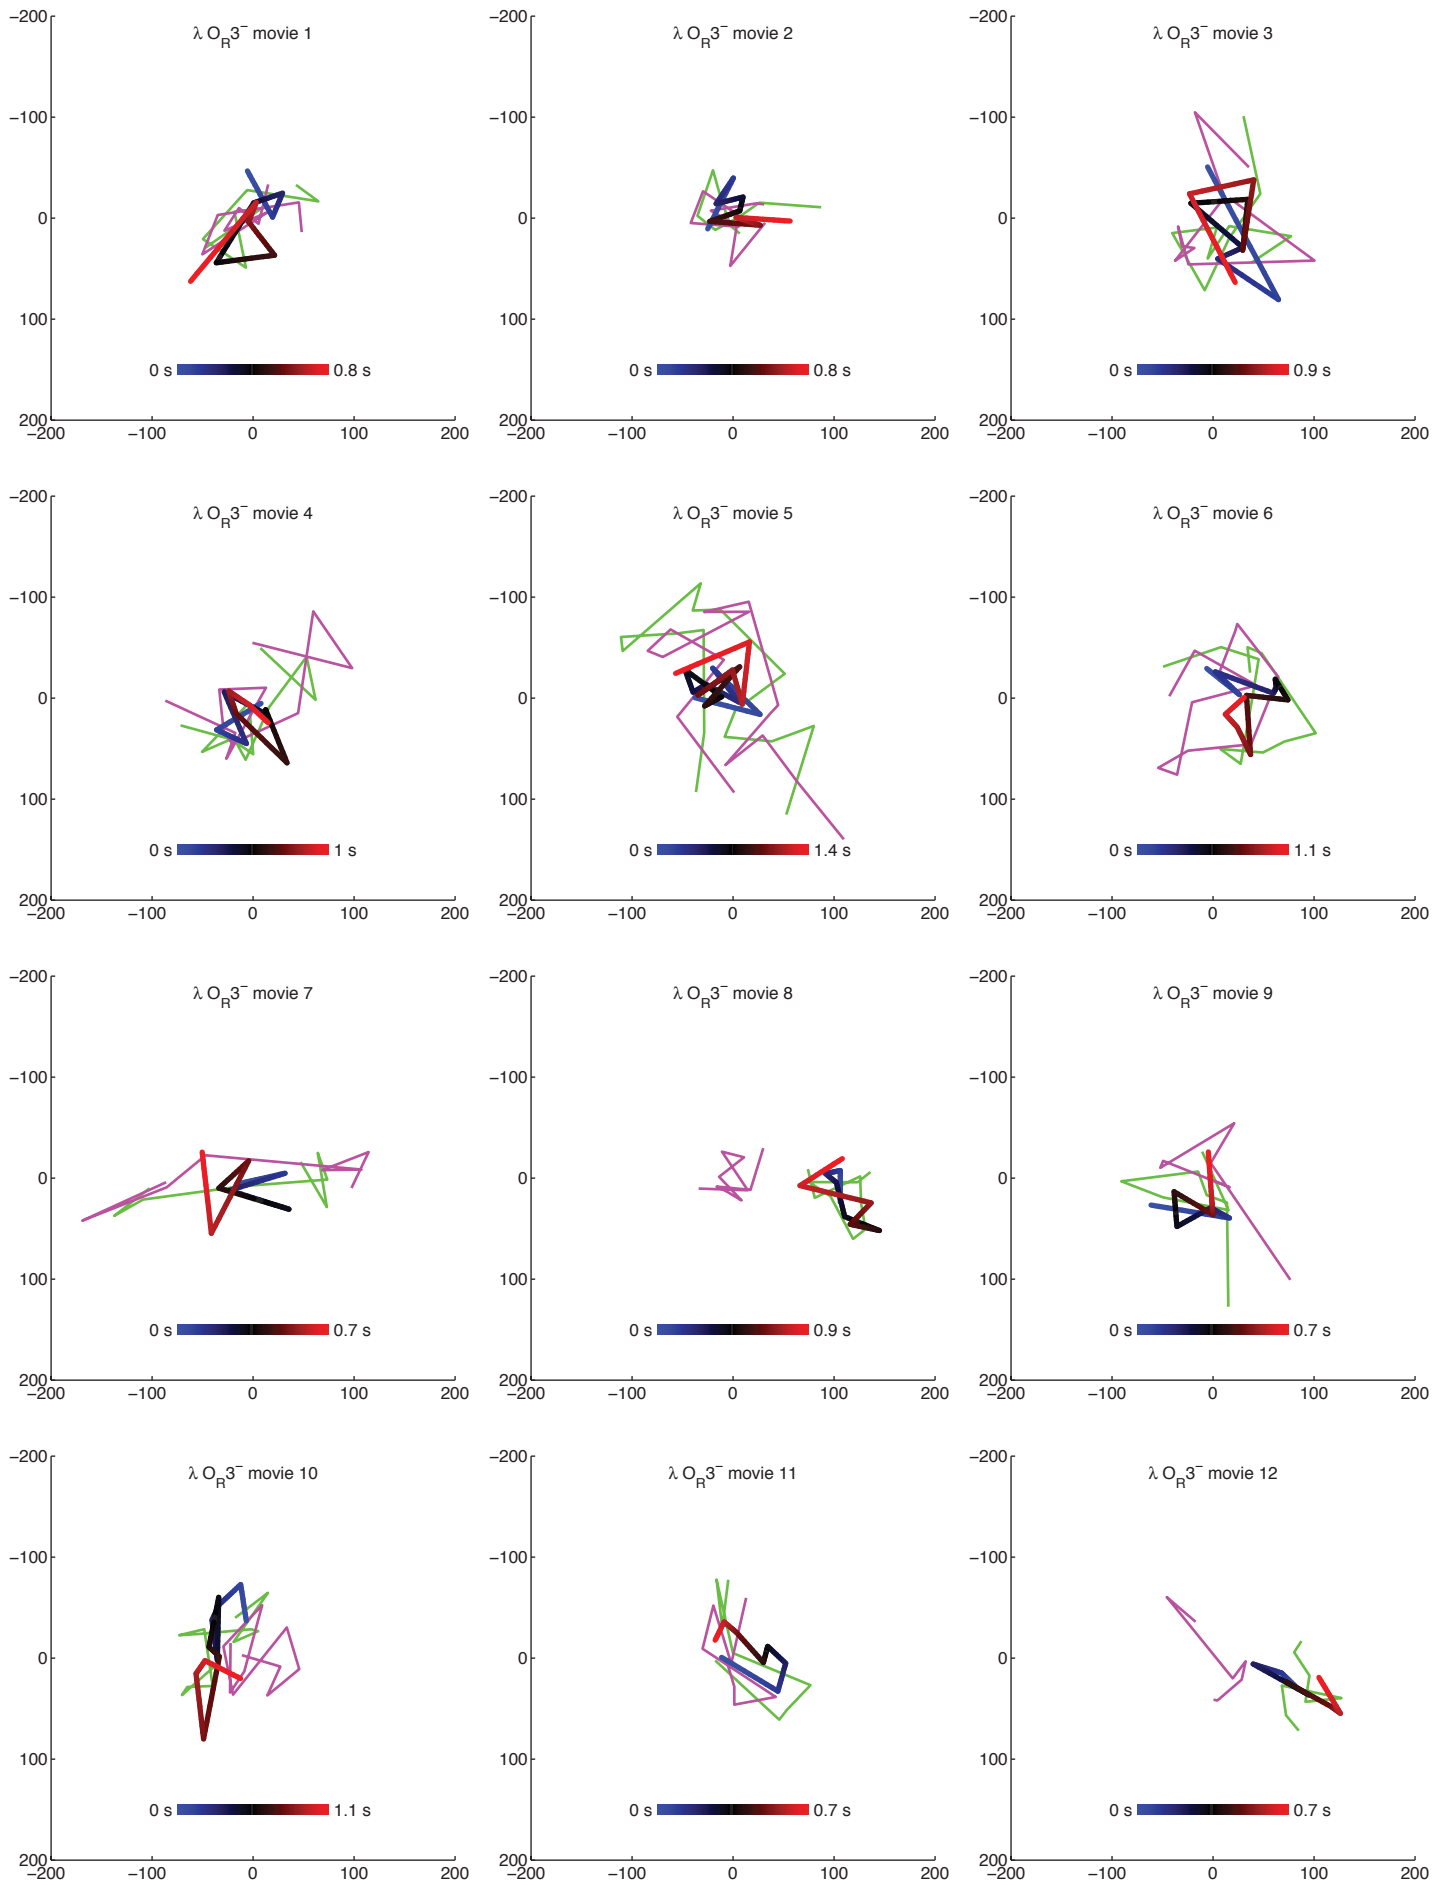

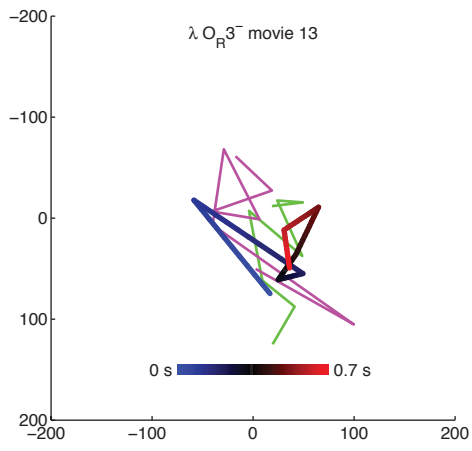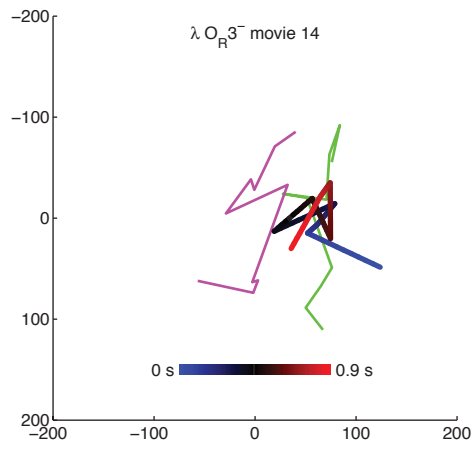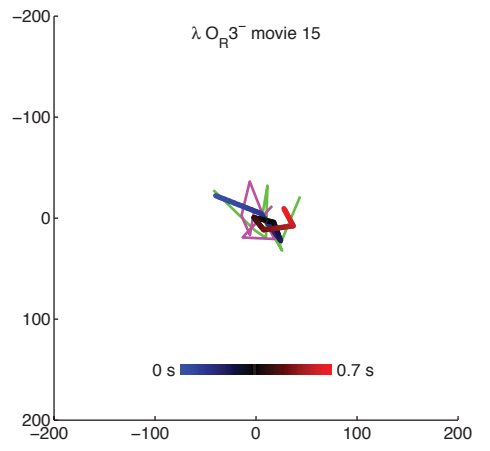

Supplement: pbio.1001591.s003.pdf [file pbio.1001591.s003.pdf]
